# Supplementary material
Source: PubMed Central journal article supplement (PMC3778168)
Supplement: NIHMS473310-supplement-01.pdf [file NIHMS473310-supplement-01.pdf]

**SUPPLEMENTARY INFORMATION**

**The Adherens Junction: A Mosaic of Cadherin and  
Nectin Clusters Bundled by Actin Filaments**

**Indrajyoti Indra, Soonjin Hong, Regina Troyanovsky, Bernadett  
Kormos, Sergey Troyanovsky**

Department of Dermatology, Northwestern University, The Feinberg School of Medicine,  
Chicago, IL 60611

Contact: [s-troyanovsky@northwestern.edu](mailto:s-troyanovsky@northwestern.edu)

**Contents:**

Supplementary Figures S1–S4

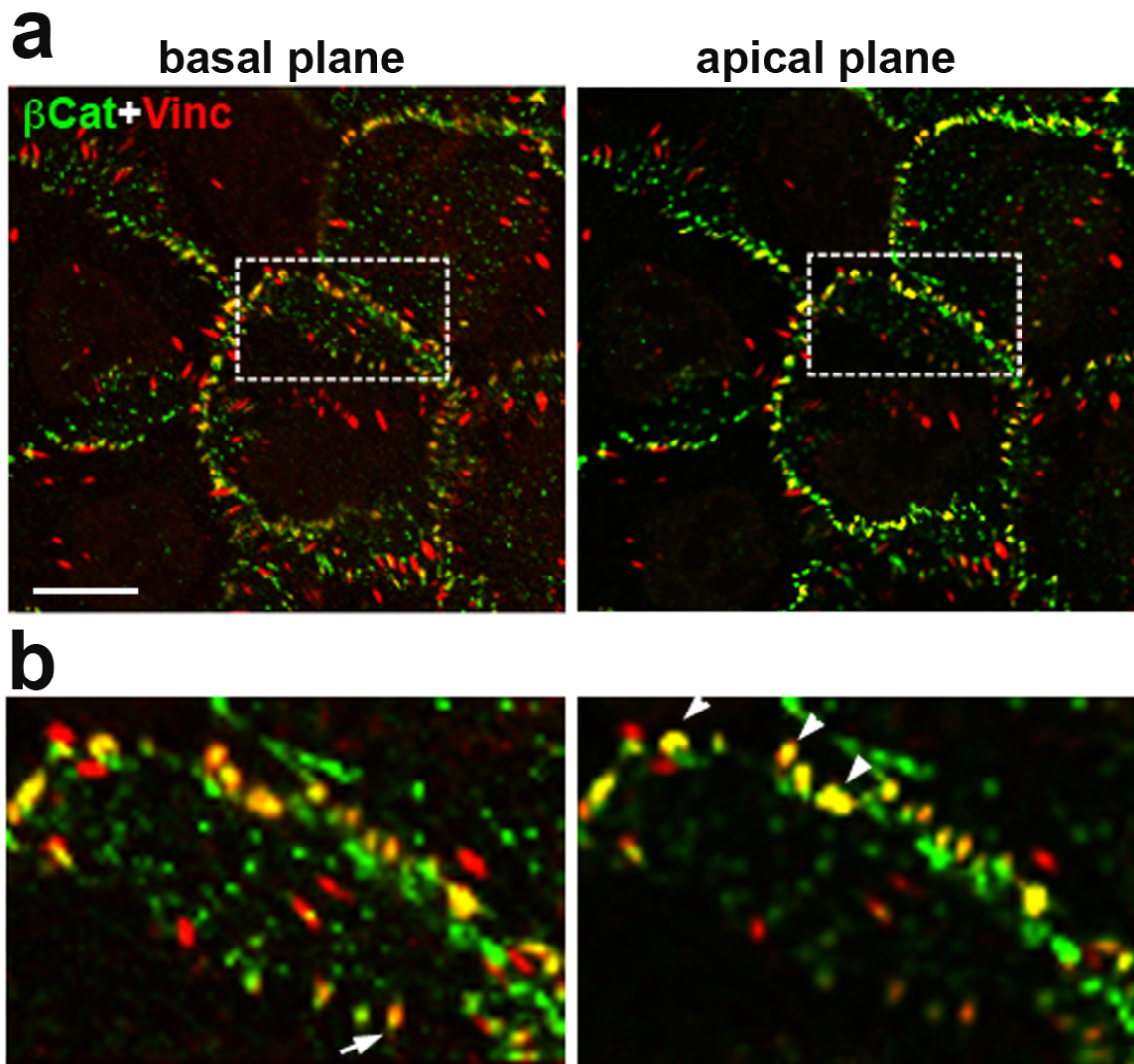

**Figure S1: Heterogeneity of adherens junctions in A431 cells.** Double immunofluorescence microscopy of A431 cells using rabbit anti- $\beta$ -catenin (green) in comparison with mouse anti-vinculin (red). The images were taken in two, apical and basal, focus planes using confocal microscope Nikon A1R. Low magnification images (upper row) show general distribution of the vinculin-positive and cadherin/catenin-positive structures. Note that only a fraction of these structures, predominantly located at the apical level, contains both proteins. Bar, 20  $\mu$ m. (b) The higher magnification of the cell-cell contact denoted by broken line. Note that majority of apical junctions (some of them are marked by arrowheads in the apical image) are positive for both vinculin and  $\beta$ -catenin. Some of the lateral junctions (marked by an arrowhead on the basal image) also exhibit weak vinculin staining. Most of the lateral junctions, however, lack vinculin staining.

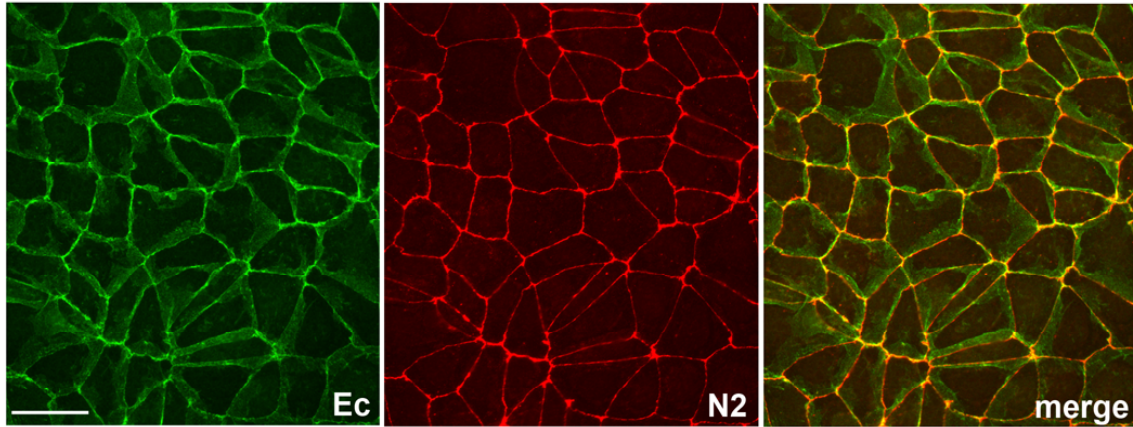

**Figure S2: Nectin and cadherin localization in highly polarized colon carcinoma DLD1 cells.** Double-label immunofluorescence microscopy of DLD1 cells for E-cadherin (Ec, green) and for nectin-2 (N2, red). Note that the majority of nectin-2 is concentrated in the apical junctional complex, where it is co-localized with E-cadherin. Super-resolution microscopy (see Fig. 4b) shows, however, that these two proteins are present in distinct clusters. Bar, 40  $\mu\text{m}$ .

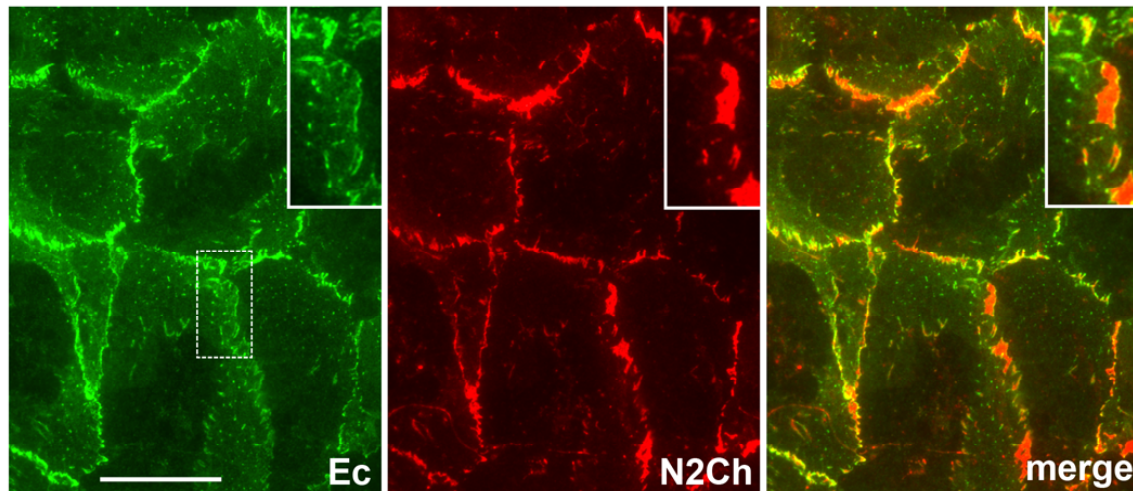

**Figure S3: Cadherin junctions are nectin-independent.** Double-label immunofluorescence microscopy of A431 cells overexpressing recombinant mCherry-tagged nectin-2. Cells were double stained for E-cadherin (Ec, green) and for mCherry (N2Ch, red). Higher magnifications of the boxed region is shown in the insets. Note that E-cadherin is not present in the giant clusters formed by overexpressed nectin-2. Instead, it tends to be concentrated on the periphery of these giant clusters. Bar, 20  $\mu$ m.

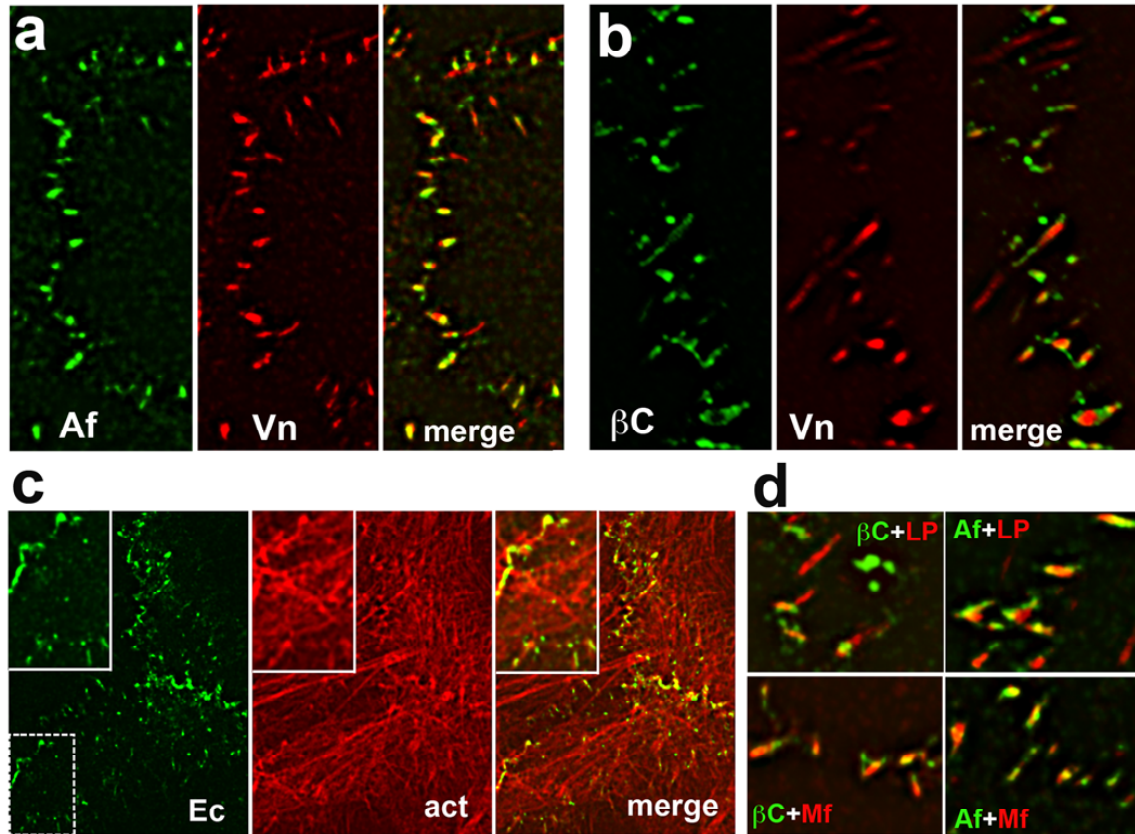

**Figure S4: Characterization of the actin cytoskeleton associated with adherens junctions.** (a and b) N-SIM-generated images of A431 cells stained for afadin (Af, green) and vinculin (Vn, red) and  $\beta$ -catenin ( $\beta$ C) and vinculin (Vn). (c) N-SIM-generated images of cells stained for E-cadherin (Ec, green) and F-actin (act, red) using phalloidin. (d) N-SIM-generated images of adherens junctions stained either for  $\beta$ -catenin ( $\beta$ C, green) or afadin (Af, green) and either LPP (LP, red) or migfilin (Mf, red).
